# Supplementary material
Source: PubMed Central journal article supplement (PMC3284360)
Supplement: SD2.pdf [file SD2.pdf]

# Clustering of Triatoma Infestation in Guatemala

Source: National Chagas Disease Program,  
Ministry of Health

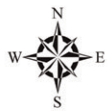

0 26,500 53,000 106,000 Meters

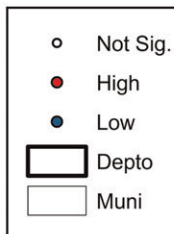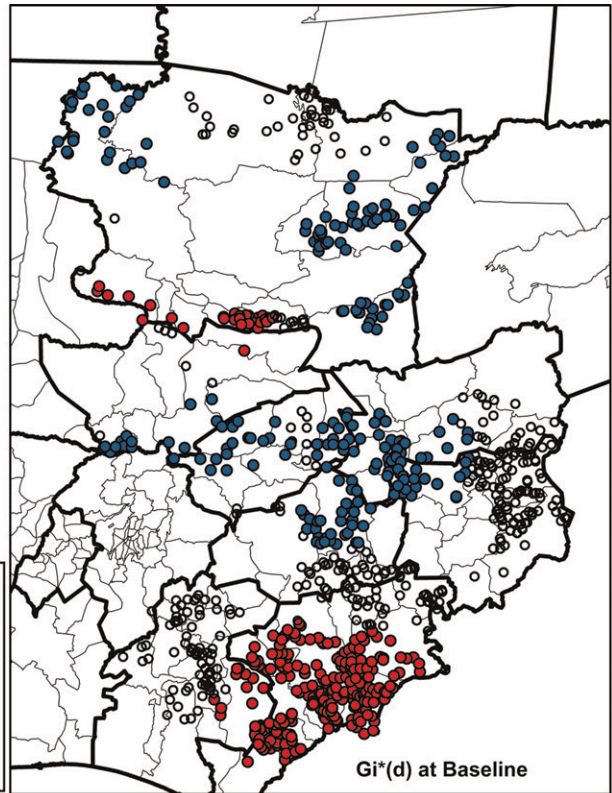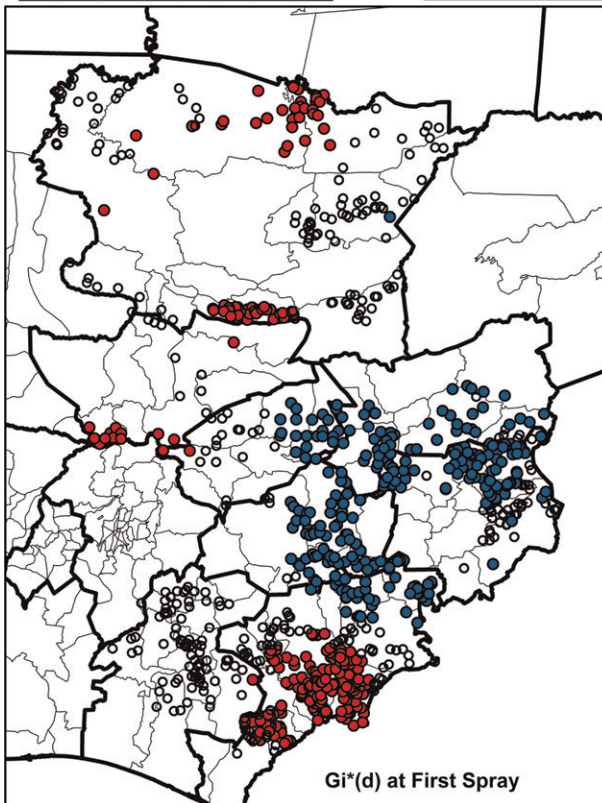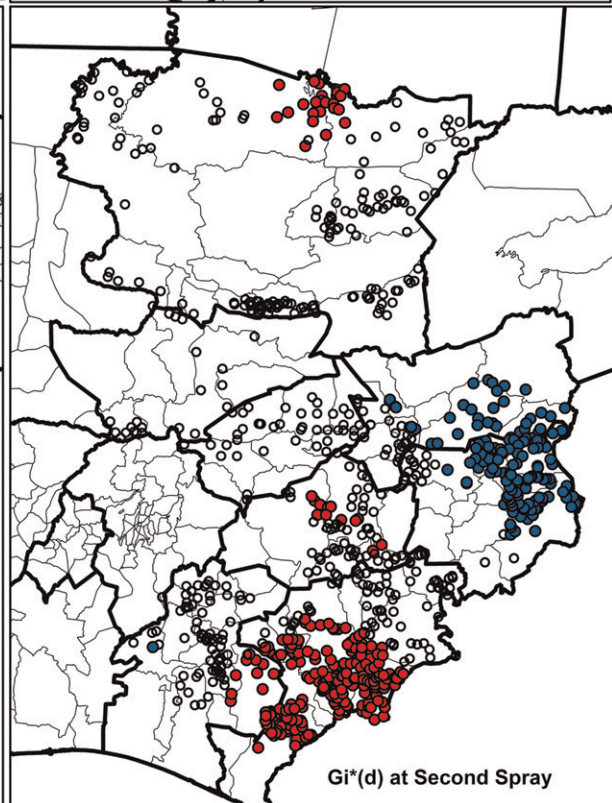

**Global mean indices of infestation (*n* = 838):**

- (1) Baseline = 27.01
- (2) Spray 1 = 5.52
- (3) Spray 2 = 4.17

A McNemar test for correlated proportions found a statistically significant difference in the proportion of houses infested between baseline and spray 1 ( $P < 0.001$ ) and between sprays 1 and 2 ( $P < 0.001$ ). In addition, a Friedman test showed that the mean indices of infestation were statistically significantly different across all three time points ( $P < 0.001$ ).

**Regression Analyses**

TABLE A1

Relationship between reinfestation after first residual insecticide spray and time lapse during first spray

| Model 1 ( <i>N</i> = 811) | Odds ratio | 95% CI    | <i>P</i> value |
|---------------------------|------------|-----------|----------------|
| Time lapse 180–360 days   | 1.65       | 1.09–2.50 | 0.019          |
| Time lapse > 360 days     | 3.33       | 2.19–5.05 | < 0.001        |
| High cluster at baseline  | 1.04       | 0.76–1.42 | 0.799          |
| Quarter 2 vs. quarter 1   | 0.69       | 0.46–1.03 | 0.069          |
| Quarter 3 vs. quarter 1   | 1.08       | 0.72–1.62 | 0.711          |
| Quarter 4 vs. quarter 1   | 0.64       | 0.39–1.04 | 0.070          |

CI = confidence interval; quarter 1 = January to March; quarter 2 = April to June; quarter 3 = July to September; quarter 4 = October to December.

TABLE A2

Relationship between reinfestation after second residual insecticide spray and time lapse during second spray

| Model 2 ( <i>N</i> = 663) | Odds ratio | 95% CI     | <i>P</i> value |
|---------------------------|------------|------------|----------------|
| Time lapse 180–360 days   | 1.37       | 0.96–1.58  | 0.084          |
| Time lapse > 360 days     | 1.17       | 0.81–1.68  | 0.411          |
| Reinfested after spray 1  | 2.12       | 1.50–3.01  | < 0.001        |
| Quarter 2 vs. quarter 1   | 1.10       | 0.68–1.80  | 0.699          |
| Quarter 3 vs. quarter 1   | 0.80       | 0.477–1.34 | 0.400          |
| Quarter 4 vs. quarter 1   | 1.32       | 0.74–2.33  | 0.346          |

CI = confidence interval; quarter 1 = January to March; quarter 2 = April to June; quarter 3 = July to September; quarter 4 = October to December.

TABLE A3

Relationship between falling in a high infestation cluster after first residual insecticide spray and time lapse during first spray

| Model 3 ( <i>N</i> = 838) | High cluster after spray 1 | 95% CI      | <i>P</i> value |
|---------------------------|----------------------------|-------------|----------------|
| Time lapse 180–360 days   | 6.91                       | 3.68–12.97  | 0.000          |
| Time lapse ≥ 360 days     | 5.79                       | 3.10–10.82  | 0.000          |
| High cluster at baseline  | 17.98                      | 12.09–26.74 | 0.000          |

CI = confidence interval.

TABLE A4

Relationship between falling in a high infestation cluster after second residual insecticide spray and time lapse during second spray

| Model 4 ( <i>N</i> = 838) | High cluster after spray 2 | 95% CI    | <i>P</i> value |
|---------------------------|----------------------------|-----------|----------------|
| Time lapse 180–360 days   | 2.64                       | 1.78–3.39 | 0.000          |
| Time lapse ≥ 360 days     | 0.70                       | 0.51–0.96 | 0.030          |
| Reinfested after spray 1  | 2.92                       | 2.09–4.07 | 0.000          |

CI = confidence interval.
